# Supplementary material for: Inflammatory Conditions During Pregnancy and Risk of Autism and Other Neurodevelopmental Disorders
Source: PubMed Central journal article supplement — Biol Psychiatry Glob Open Sci. 2023 Oct 11;4(1):39–50. doi: 10.1016/j.bpsgos.2023.09.008 (PMC10689278; doi:10.1016/j.bpsgos.2023.09.008), 2023-10-11
Supplement: mmc1.pdf [file mmc1.pdf]

## **SUPPLEMENTARY INFORMATION**

### **Inflammatory Conditions During Pregnancy and Risk of Autism and Other Neurodevelopmental Disorders**

*Croen et al.*

## **Supplementary Methods for Sample Collection and Genotyping**

### **Genetic Sample Collection**

Maternal blood and serum specimens were deidentified and aliquoted into 2D barcoded storage vials using robotic liquid handlers (Tecan EVO 150, Fluent 780). DNA was extracted from blood/buffy coat using Life Technologies MAGMAX/MAGJET DNA ULTRA 2.0 reagents. DNA quantity was measured by Infinity M200, M-NANO multimode detectors or Qubit fluorometers. DNA specimens were normalized and aliquoted using Tecan Fluent 780/1080 robots in standard 96 well PCR plates or Micronic tubes for distribution.

### **Genotyping**

Samples were genotyped using the Axiom Precision Medicine Research Array (PMRA) by the Genomics Core Facility at UCSF. The PMRA assays approximately 800,000 markers across the genome and is optimized for imputation in five ancestral population groups [African (AFR), admixed American (AMR), East Asian (EAS), European (EUR), and South Asian (SAS) ancestry]. Genotype calling and quality control were carried out as in Tsang et al., 2013 (1). We performed genotyping on DNA from 2561 IMPaCT samples in two batches.

Among all the samples, 4 (0.16%) were excluded due to Dish QC less than 0.82, 14 (0.55%) were excluded for having a call rate per SNP less than 97%, 21 (0.82%) were excluded for having missingness per individual larger than 97%. After quality control 2522 samples remained. We then used PLINK (2) to calculate pairwise genetic relatedness between individuals, excluding those that were estimated to be first-, second-, or third-degree relatives (85 individuals, 3.37% of QC passing samples). We filtered markers following the process outlined in Tsang et

al., 2013 (1) resulting in 727,655 markers. Genomes were then imputed using the Michigan Imputation Server (3) with the 1000 Genomes Reference panel (4). After imputation the number of markers was increased to 30,969,804.

1. Tsang KM, Croen LA, Torres AR, Kharrazi M, Delorenze GN, Windham GC, et al. (2013): A genome-wide survey of transgenerational genetic effects in autism. *PLoS One*. 8:e76978.
2. Chang CC, Chow CC, Tellier LC, Vattikuti S, Purcell SM, Lee JJ (2015): Second-generation PLINK: rising to the challenge of larger and richer datasets. *Gigascience*. 4:7.
3. Das S, Forer L, Schonherr S, Sidore C, Locke AE, Kwong A, et al. (2016): Next-generation genotype imputation service and methods. *Nat Genet*. 48:1284-1287.
4. Fairley S, Lowy-Gallego E, Perry E, Flicek P (2020): The International Genome Sample Resource (IGSR) collection of open human genomic variation resources. *Nucleic Acids Res*. 48:D941-D947.

**Table S1:** Definitions of child neurodevelopmental disorders and maternal immune-mediated and cardiometabolic conditions

| Condition                  | ICD codes |                                                                                                                                                                                                                                                                                                                                                                                        | Definition                                                                                                  |
|----------------------------|-----------|----------------------------------------------------------------------------------------------------------------------------------------------------------------------------------------------------------------------------------------------------------------------------------------------------------------------------------------------------------------------------------------|-------------------------------------------------------------------------------------------------------------|
| <b>Child conditions</b>    |           |                                                                                                                                                                                                                                                                                                                                                                                        |                                                                                                             |
| ASD                        | ICD-9     | 299.0, 299.8, 299.9                                                                                                                                                                                                                                                                                                                                                                    | >=1 dx                                                                                                      |
|                            | ICD-10    | F84.0, F84.5, F84.8, F84.9                                                                                                                                                                                                                                                                                                                                                             |                                                                                                             |
| DD                         |           | Any ID, CP, Language Delay, Motor Disorder, Global Delay, or Learning Disorder diagnosis as defined below                                                                                                                                                                                                                                                                              | >=1 dx                                                                                                      |
| ID                         | ICD-9     | 317-319                                                                                                                                                                                                                                                                                                                                                                                | >=1 dx                                                                                                      |
|                            | ICD-10    | F70-F73, F78, F79                                                                                                                                                                                                                                                                                                                                                                      |                                                                                                             |
| CP                         | ICD-9     | 333.71, 342.1, 342.8, 342.9, 343.0-343.9, 344.0, 344.1, 344.30, 344.31, 344.32, 344.5                                                                                                                                                                                                                                                                                                  | >=1 dx                                                                                                      |
|                            | ICD-10    | G04.1, G80.0 - G80.4, G80.8, G80.9, G81.1, G81.9, G82.20-G82.22, G82.5, G83.10 - G83.14, G83.30 - G83.34, R25.8                                                                                                                                                                                                                                                                        |                                                                                                             |
| Language Delay             | ICD-9     | 315.3                                                                                                                                                                                                                                                                                                                                                                                  | >=1 dx                                                                                                      |
|                            | ICD-10    | F80.0-F80.2, F80.4, F80.82, F80.89, F80.9, H93.25                                                                                                                                                                                                                                                                                                                                      |                                                                                                             |
| Motor Disorder             | ICD-9     | 315.4                                                                                                                                                                                                                                                                                                                                                                                  | >=1 dx                                                                                                      |
|                            | ICD-10    | F82                                                                                                                                                                                                                                                                                                                                                                                    |                                                                                                             |
| Global Delay               | ICD-9     | 315.5, 315.8, 315.9                                                                                                                                                                                                                                                                                                                                                                    | >=1 in this group or >=1 dx in any two of the following (language delay, motor disorder, learning disorder) |
|                            | ICD-10    | F81.9, F88, F89                                                                                                                                                                                                                                                                                                                                                                        |                                                                                                             |
| Learning Disorder          | ICD-9     | 315.0, 315.1, 315.2                                                                                                                                                                                                                                                                                                                                                                    | >=1 dx                                                                                                      |
|                            | ICD-10    | F81.0, F81.2, F81.81, F81.89, R48.0                                                                                                                                                                                                                                                                                                                                                    |                                                                                                             |
| <b>Maternal conditions</b> |           |                                                                                                                                                                                                                                                                                                                                                                                        |                                                                                                             |
| Allergy                    | ICD-9     | 279, 287.0, 322.8, 323.8, 381.04-381.06, 372.0, 372.10-372.14, 372.2, 372.3, 373.32, 380.22, 381.3, 381.4, 477, 495.0-495.7, 495.9, 518.3, 518.6, 530.19, 558.3, 691, 692.0-692.6, 692.70-692.72, 692.76, 692.79, 692.81, 692.83, 692.89, 692.9, 695.1, 692.3, 693.1, 708.0, 708.1, 708.9, 716.2, 727.3, 780.63, 989.82, 995.0-995.4, 995.6, 999.4, 999.39, V14.0-V14.9, V15.0, V64.04 | >=1 dx during pregnancy                                                                                     |

| Condition  | ICD codes |                                                                                                                                                                                                                                                                                                                                                                                                                                                                                                                                                                                                                                                                                                                                                                                                                                                                                                                                                                                                                                                                                                                                                                                                                                                                                                                                                          | Definition                                                       |
|------------|-----------|----------------------------------------------------------------------------------------------------------------------------------------------------------------------------------------------------------------------------------------------------------------------------------------------------------------------------------------------------------------------------------------------------------------------------------------------------------------------------------------------------------------------------------------------------------------------------------------------------------------------------------------------------------------------------------------------------------------------------------------------------------------------------------------------------------------------------------------------------------------------------------------------------------------------------------------------------------------------------------------------------------------------------------------------------------------------------------------------------------------------------------------------------------------------------------------------------------------------------------------------------------------------------------------------------------------------------------------------------------|------------------------------------------------------------------|
|            | ICD-10    | B44.81, D69.0, D80, D81.0, D81.1, D81.2, D81.4, D81.6-D81.9, D82, D83, D84, D89.8, D89.3, D89.89, D89.9, G04.81, G04.89, H01.11, H10, H16.26, H60.5, H65.11, H65.4, H65.9, J30, J67.0-J67.7, J67.9, J82, K20.8, K52.2, L12.3, L20, L22-L25, L27.2, L30.0, L30.2, L30.8, L30.9, L50.0, L50.1, L50.9, L51, L55.0, L55.1, L55.9, L56.0-L56.3, L56.8, L56.9, M13.8, M35.9, M71.1, M71.5, N98.0, R50.83, T36-T50, T65.81, T78.0, T78.2, T78.3, T78.4, T80.5, T80.29, T88.0, T88.2, T88.52, T88.59, T88.6, Z28.04, Z88, Z91.0                                                                                                                                                                                                                                                                                                                                                                                                                                                                                                                                                                                                                                                                                                                                                                                                                                  |                                                                  |
| Asthma     | ICD-9     | 493, 495.8, 518.3, 518.6, 518.81-518.84, 519.11, 786.07                                                                                                                                                                                                                                                                                                                                                                                                                                                                                                                                                                                                                                                                                                                                                                                                                                                                                                                                                                                                                                                                                                                                                                                                                                                                                                  | >=2dx during pregnancy, or Rx during pregnancy w/ asthma history |
|            | ICD-10    | B44.81, J44, J45, J67.8, J80, J82, J96.00, J96.90, J96.10-J96.12, J96.20-J96.22, J98.01, R06.03, R06.2                                                                                                                                                                                                                                                                                                                                                                                                                                                                                                                                                                                                                                                                                                                                                                                                                                                                                                                                                                                                                                                                                                                                                                                                                                                   |                                                                  |
| Autoimmune | ICD-9     | 099.3, 135, 136.1, 242.0, 242.2, 242.4, 242.8, 242.9, 245.2, 250.01, 250.03, 250.11, 250.13, 250.21, 250.23, 250.31, 250.33, 250.41, 250.43, 250.51, 250.53, 250.61, 250.63, 250.71, 250.73, 250.81, 250.83, 250.91, 250.93, 255.4, 258.1, 273.2, 279.0-279.5, 279.8, 279.9, 283.0, 286.52, 287.31, 287.32, 287.4, 287.5, 321.4, 323.51, 323.52, 340, 358.1, 357.0, 357.81, 358.0, 359.71, 360.11, 360.12, 362.18, 363.2, 364.3, 695.4, 373.34, 376.12, 377.30, 377.31, 377.39, 386.0, 390-398, 443.0, 446.0, 446.1, 446.20, 446.21, 446.29, 446.4-446.7, 447.6, 447.8, 516.3, 517.2, 517.8, 555, 556, 558, 571.42, 571.49, 571.6, 573.3, 576.1, 579.0-579.4, 579.8, 579.9, 583.89, 583.9, 694.4, 694.5, 694.9, 695.13, 695.14, 696, 697, 701.0, 704.0, 709, 710.0-710.4, 710.8, 710.9, 711.1, 711.2, 711.9, 714.0-714.3, 714.9, 720.0, 720.9, 725, 728.11, 728.81, 733.99, 775.2, V12.3                                                                                                                                                                                                                                                                                                                                                                                                                                                                 | >=1 dx during pregnancy                                          |
| Autoimmune | ICD-10    | D59.0, D59.1, D68.311, D69.3, D69.41, D69.5, D69.6, D80, D81.0, D81.1, D81.2, D81.4, D81.6, D81.7, D81.89, D81.9, D82, D83, D84, D86, D89.1, D89.3, D89.81, D89.82, D89.89, D89.9, E05.0, E05.2, E05.3, E05.4, E05.8, E05.9, E06.3, E08.628, E09.628, E10, E27.1-E27.4, E31.0, E89.6, G02, G04.02, G04.32, G61.0, G61.81, G35, G70.0, G72.41, G73.3, H01.12, H05.12, H20.9, H30.2, H30.8, H30.9, H35.06, H44.11, H44.13, H46.0, H46.8, H46.9, H81.0, I00-I09, I73.0, I77.3, I77.6, I77.89, J84.11, J84.2, J99, K50, K51.919, K52, K71, K73.1, K73.2, K73.8, K74.3, K74.4, K74.5, K75.2, K75.3, K75.4, K75.8, K75.9, K76.4, K80.3, K83.0, K90, K91.2, L10, L12.0, L12.8, L12.9, L13.9, L30.5, L40-L43, L44.0-L44.3, L44.8, L44.9, L45, L51.1, L51.3, L57.3, L63, L64, L65, L66.0-L66.2, L66.8, L66.9, L80, L81, L90.0, L90.5, L92.1, L92.3, L93, L94.0, L94.1, L94.2, L94.3, L94.4, L94.5, L94.8, L95.0, L95.8, L95.9, L98.8, L98.9, L99, M01, M02.3, M05.0, M05.2, M05.3, M05.4, M05.5, M05.6, M05.7, M05.8, M06, M08, M30, , M31.0, M31.1, M31.3-M31.7, M32-M34, M35.0-M35.3, M35.5, M35.8, M35.9, M36.0, M36.8, M45, M46.9, M48.8, M60.1, M61.1, M84.8, M84.9, M85.1, M85.8, M89.2, M89.3, M89.5, M89.8, M94.1, M94.35, M94.8, N05.0, N05.1, N05.6-N05.9, N06.0, N06.1, N06.6-N06.9, N07.0, N07.1, N07.6-N07.9, N14, N15.0, N15.8, N15.9, P94.0, Z86.2 |                                                                  |

| Condition            | ICD codes |                                                                                                                                                                                                                                                                                                                                                                                                                                                                                                                                                                                                                                                                                                                                                                                                                                                                                                                                                                                                                                                                                                                                                                                                                                                                                                                                                    | Definition                                                                                          |
|----------------------|-----------|----------------------------------------------------------------------------------------------------------------------------------------------------------------------------------------------------------------------------------------------------------------------------------------------------------------------------------------------------------------------------------------------------------------------------------------------------------------------------------------------------------------------------------------------------------------------------------------------------------------------------------------------------------------------------------------------------------------------------------------------------------------------------------------------------------------------------------------------------------------------------------------------------------------------------------------------------------------------------------------------------------------------------------------------------------------------------------------------------------------------------------------------------------------------------------------------------------------------------------------------------------------------------------------------------------------------------------------------------|-----------------------------------------------------------------------------------------------------|
| Infection            | ICD-9     | 001-018, 020-027, 030-039, 040-042, 045-066, 070-088, 090-104, 110-112, 114-118, 136, 289.1, 289.2, 289.3, 320-322, 323.0-323.6, 323.8, 323.9, 324-326, 357.0, 357.4, 360.0, 360.12, 360.13, 360.19, 363.0-363.2, 364.0-364.3, 370.32, 372.00-372.05, 372.10-372.13, 372.15, 372.2, 372.30, 372.31, 372.33, 372.39, 373.0, 373.1, 373.4-373.9, 380.0-380.2, 381.0-381.5, 382, 383, 384.0, 384.1, 385, 386.0-386.3, 387, 388.0, 388.2, 388.3, 388.40, 388.41, 388.5, 388.8, 388.9, 389-392, 420-422, 424.9, 460-466, 472, 473, 476, 480-488, 490, 517.1, 522.5-522.7, 527.2, 527.3, 528.00, 528.1, 528.3, 535.0-535.2, 535.4-535.6, 540, 567.0-567.3, 567.8, 567.9, 573.1, 577.0, 583.0, 583.4, 583.9, 590, 595, 597, 599.0, 599.2, 601, 604, 608.81, 614-616, 658.4, 680-686, 711.4-711.9, 713.5, 730.81, 730.88, 762.7, 770.0, 771, 785.6, 790.7, 790.8, 795.71, 995.91, V04.82, V08, V65.44                                                                                                                                                                                                                                                                                                                                                                                                                                                      | >=1 dx during pregnancy                                                                             |
|                      | ICD-10    | A00-A09, A15, A17, A18, A19, A20-A28, A30-A33, A35-A44, A45.86, A46, A48-A58, A60, A63-A71, A74, A75, A77-A96, A98, A99, B00-B10, B15-B20, B25-B27, B28.85, B30, B33-B43, B44.0-B44.2, B44.7, B44.89, B44.9, B45-B55, B57, B60.0, B60.12, B60.8, B64, B77.81, B78.1, B95-B97, E83.2, G00-G03, G04.0, G04.2-G04.9, G05-G09, G37.4, G61.0, H00.0, H01.0, H01.8, H01.9, H10.0, H10.1, H10.22, H10.23, H10.3, H10.40, H10.42-H10.44, H10.5, H10.8, H10.9, H16.26, H20, H21.33, H30, H32, H33.12, H40.40X0, H44.0, H44.11, H44.12, H44.19, H60.0-H60.4, H60.6-H60.9, H61.0, H61.9, H62.4, H62.8, H65-H67, H68.0, H70, H71, H73.0-H73.2, H74, H75, H80, H81.0-H81.4, H83.0, H90, H91, H93.0, H93.1, H93.22, H93.24, H93.29, H93.3, H93.8, H93.9, H94.0, H94.8, H95.0, H95.1, I00-I02, I30, I32, I33.9, I38-I41, I67.3, I88, J00-J17, J18.0, J18.1, J18.8, J18.9, J20, J21, J31, J32, J37, J40, K04.5, K04.6, K04.7, K11.2, K12.2, K29, N34.1, K35, K65, K66.8, K67, K68.12, K68.19, K68.9, K77, K90.81, L01-L08, L44.4, L88, L92.8, L98.0, L98.3, M00.0-M00.2, M00.8, M01, M02.3, M02.80-M02.89, M32.11, M32.12, M60.009, M90.81, M90.88, N10-N12, N13.6, N15.1, N15.9, N16, N28.84, N28.85, N28.86, N30.0, N30.2, N30.3, N30.8, N30.9, N34, N36.1, N39.0, N41, N45, N51, N70-N77, O41.1, P02.7, P23, P35-P39, R11.11, R59, R75, R78.81, Z21, Z23, Z71.7 |                                                                                                     |
| Gestational Diabetes | ICD-9     | 648.8                                                                                                                                                                                                                                                                                                                                                                                                                                                                                                                                                                                                                                                                                                                                                                                                                                                                                                                                                                                                                                                                                                                                                                                                                                                                                                                                              | >=1 dx & >=1 Lab glucose abnormal results during pregnancy, or Carpenter and Coustan (C&C) criteria |
|                      | ICD-10    | O24.4                                                                                                                                                                                                                                                                                                                                                                                                                                                                                                                                                                                                                                                                                                                                                                                                                                                                                                                                                                                                                                                                                                                                                                                                                                                                                                                                              |                                                                                                     |
| Diabetes             | ICD-9     | 250                                                                                                                                                                                                                                                                                                                                                                                                                                                                                                                                                                                                                                                                                                                                                                                                                                                                                                                                                                                                                                                                                                                                                                                                                                                                                                                                                | >=2 dx, or >=2 Lab abnormal results, or >=1 Rx before/during pregnancy                              |
|                      | ICD-10    | E10, E11, E13, O24.0, O24.1, O24.3, O24.8, O24.9                                                                                                                                                                                                                                                                                                                                                                                                                                                                                                                                                                                                                                                                                                                                                                                                                                                                                                                                                                                                                                                                                                                                                                                                                                                                                                   |                                                                                                     |

| <b>Condition</b>                                                    | <b>ICD codes</b> |                                           | <b>Definition</b>                                                                                                                    |
|---------------------------------------------------------------------|------------------|-------------------------------------------|--------------------------------------------------------------------------------------------------------------------------------------|
| Obesity<br>Obesity Class I<br>Obesity Class II<br>Obesity Class III | ICD-9            | 278.00-278.03, 783.22                     | ≥1 dx or BMI recorded just before pregnancy<br><br>Class I:<br>30 ≤ BMI < 35<br>Class II:<br>35 ≤ BMI < 40<br>Class III:<br>BMI ≥ 40 |
|                                                                     | ICD-10           | E66.01, E66.2, E66.3, E66.9, R63.6        |                                                                                                                                      |
| Preeclampsia                                                        | ICD-9            | 642.4, 642.5, 642.7                       | ≥2 dx during pregnancy                                                                                                               |
|                                                                     | ICD-10           | O11, O14, O15.2                           |                                                                                                                                      |
| Hypertension<br>Chronic HTN<br>Gestational HTN                      | ICD-9            | Chronic: 401-405<br>Gestational: 642.3    | Chronic: ≥2 dx, or ≥1 dx & rx during pregnancy.<br><br>Gestational: ≥1 dx during pregnancy                                           |
|                                                                     | ICD-10           | Chronic: I10-I13, I15<br>Gestational: O13 |                                                                                                                                      |

ASD=Autism Spectrum Disorder; ID=Intellectual Disability; CP=Cerebral Palsy; DD=Neurodevelopmental Disorder; ICD=International Classification of Diseases; HTN=Hypertension

**Table S2.** Associations of maternal asthma and obesity with child neurodevelopmental outcomes by race/ethnicity

|                | <b>ASD</b>          | <b>DD</b>           | <b>GP</b>           | <b>ASD vs GP</b>  |                                   | <b>DD vs GP</b>   |                                   |
|----------------|---------------------|---------------------|---------------------|-------------------|-----------------------------------|-------------------|-----------------------------------|
|                | n (%) in race group | n (%) in race group | n (%) in race group | Crude OR (95% CI) | Adjusted <sup>a</sup> OR (95% CI) | Crude OR (95% CI) | Adjusted <sup>a</sup> OR (95% CI) |
| <b>Asthma</b>  |                     |                     |                     |                   |                                   |                   |                                   |
| Asian          | 5 (7.81)            | 28 (10.53)          | 18 (8.82)           | 0.88 (0.31-2.46)  | 0.75 (0.26-2.18)                  | 1.22 (0.65-2.27)  | 1.13 (0.59-2.15)                  |
| Black          | 3 (15.00)           | 18 (22.50)          | 8 (16.67)           | 0.88 (0.21-3.74)  | 0.75 (0.11-4.97)*                 | 1.45 (0.58-3.65)  | 1.55 (0.58-4.14)                  |
| Hispanic       | 15 (21.74)          | 73 (22.60)          | 31 (13.66)          | 1.76 (0.88-3.49)  | 1.74 (0.82-3.70)                  | 1.85 (1.17-2.92)  | 1.99 (1.23-3.21)                  |
| Other          | 3 (21.43)           | 8 (13.11)           | 14 (29.17)          | 0.66 (0.16-2.74)  | 0.50 (0.11-2.42)*                 | 0.37 (0.14-0.97)  | 0.24 (0.08-0.72)                  |
| White          | 38 (26.39)          | 96 (17.11)          | 65 (14.77)          | 2.07 (1.31-3.26)  | 2.21 (1.37-3.55)                  | 1.19 (0.85-1.68)  | 1.22 (0.87-1.73)                  |
| <b>Obesity</b> |                     |                     |                     |                   |                                   |                   |                                   |
| Asian          | 5 (7.81)            | 24 (9.02)           | 22 (10.78)          | 0.72 (0.25-2.01)  | 0.84 (0.28-2.51)                  | 0.83 (0.44-1.54)  | 0.91 (0.47-1.74)                  |
| Black          | 11 (55.00)          | 34 (42.50)          | 18 (37.50)          | 2.75 (0.74-10.27) | 0.93 (0.18-4.90)*                 | 1.89 (0.79-4.50)  | 1.54 (0.57-4.18)                  |
| Hispanic       | 26 (37.58)          | 127 (39.32)         | 83 (36.56)          | 1.18 (0.60-2.34)  | 1.22 (0.59-2.54)                  | 1.16 (0.76-1.76)  | 1.29 (0.83-2.02)                  |
| Other          | 5 (35.71)           | 20 (32.79)          | 11 (22.92)          | 1.36 (0.35-5.31)  | 1.33 (0.25-7.26)*                 | 1.66 (0.65-4.27)  | 1.46 (0.50-4.29)                  |
| White          | 50 (34.72)          | 151 (26.92)         | 99 (22.50)          | 2.01 (1.27-3.17)  | 1.98 (1.23-3.19)                  | 1.21 (0.88-1.65)  | 1.24 (0.90-1.70)                  |

ASD=Autism Spectrum Disorder; DD=Neurodevelopmental Disorders; GP=General Population controls; OR=Odds Ratio; CI=Confidence Interval;

<sup>a</sup>Adjusted models include child sex, birth year, maternal age, and maternal education. Reference group for each condition is absence of the condition.



**Table S3.** Associations of treated and untreated maternal asthma with child neurodevelopmental outcomes

|                                    | ASD              | DD                | POP              | ASD vs POP           |                         | DD vs POP            |                         |
|------------------------------------|------------------|-------------------|------------------|----------------------|-------------------------|----------------------|-------------------------|
|                                    | (N=311)<br>N (%) | (N=1291)<br>N (%) | (N=967)<br>N (%) | Crude<br>OR (95% CI) | Adjusted<br>OR (95% CI) | Crude<br>OR (95% CI) | Adjusted<br>OR (95% CI) |
| Asthma with RX during pregnancy    | 31 (9.97)        | 114 (8.83)        | 70 (7.24)        | 1.49 (0.95 - 2.33)   | 1.58 (0.98 - 2.54)      | 1.27 (0.93 - 1.73)   | 1.27 (0.92 - 1.74)      |
| Asthma without Rx during pregnancy | 33 (10.61)       | 109 (8.44)        | 66 (6.83)        | 1.68 (1.08 - 2.62)   | 1.68 (1.05 - 2.67)      | 1.29 (0.93 - 1.77)   | 1.34 (0.97 - 1.85)      |

ASD=Autism Spectrum Disorder; DD=Neurodevelopmental Disorders; GP=General Population controls; OR=Odds Ratio; CI=Confidence Interval;RX=asthma medication

Adjusted models include child sex, birth year, maternal age, maternal race, and maternal education. Reference group for each condition is absence of the condition.

**Table S4.** Joint effects of maternal asthma during pregnancy, gestational diabetes, and pre-pregnancy obesity on child neurodevelopmental outcomes

| <b>ASD vs GP</b>  |             |                          |             |                          |       |                     |
|-------------------|-------------|--------------------------|-------------|--------------------------|-------|---------------------|
|                   | GDM         |                          |             |                          | P int | RERI (95% CI)       |
|                   | No GDM      |                          | GDM         |                          |       |                     |
| Asthma            | N (%)*      | OR (95% CI) <sup>a</sup> | N (%)*      | OR (95% CI) <sup>a</sup> |       |                     |
| No Asthma         | 214 (68.81) | 1.0 (ref)                | 33 (10.61)  | 1.14 (0.73 - 1.80)       |       |                     |
| Asthma            | 58 (18.65)  | 1.82 (1.26 - 2.64)       | 6 (1.93)    | 0.84 (0.32 - 2.20)       | 0.11  | -1.12 (-2.29, 0.05) |
| <b>DD vs GP</b>   |             |                          |             |                          |       |                     |
|                   | GDM         |                          |             |                          | P int | RERI (95% CI)       |
|                   | No GDM      |                          | GDM         |                          |       |                     |
| Asthma            | N (%)*      | OR (95% CI) <sup>a</sup> | N (%)*      | OR (95% CI) <sup>a</sup> |       |                     |
| No Asthma         | 904 (70.02) | 1.0 (ref)                | 164 (12.70) | 1.46 (1.10 - 1.95)       |       |                     |
| Asthma            | 185 (14.33) | 1.36 (1.05 - 1.76)       | 38 (2.94)   | 1.34 (0.78 - 2.31)       | 0.21  | -0.51 (-1.39, 0.37) |
| <b>ASD vs GP</b>  |             |                          |             |                          |       |                     |
|                   | GDM         |                          |             |                          | P int | RERI (95% CI)       |
|                   | No GDM      |                          | GDM         |                          |       |                     |
| Obesity Class     | N (%)*      | OR (95% CI) <sup>a</sup> | N (%)*      | OR (95% CI) <sup>a</sup> |       |                     |
| Not Obese         | 196 (63.02) | 1.0 (ref)                | 18 (5.79)   | 0.81 (0.45 - 1.43)       |       |                     |
| Obese all Classes | 76 (24.44)  | 1.38 (0.99 - 1.94)       | 21 (6.75)   | 1.49 (0.83 - 2.66)       | 0.54  | 0.28 (-0.75, 1.30)  |
| Obese Class I     | 38 (12.22)  | 1.21 (0.79 - 1.86)       | 12 (3.86)   | 1.35 (0.64 - 2.87)       | 0.52  | 0.34 (-0.85, 1.53)  |
| Obese Class II    | 20 (6.43)   | 1.24 (0.68 - 2.23)       | 6 (1.93)    | 1.69 (0.56 - 5.06)       | 0.44  | 0.66 (-1.38, 2.70)  |
| Obese Class III   | 18 (5.79)   | 2.43 (1.25 - 4.72)       | 3 (0.96)    | 1.52 (0.38 - 6.08)       | 0.74  | -0.76 (-3.38, 1.86) |
| <b>DD vs GP</b>   |             |                          |             |                          |       |                     |
|                   | GDM         |                          |             |                          | P int | RERI (95% CI)       |
|                   | No GDM      |                          | GDM         |                          |       |                     |
| Obesity Class     | N (%)*      | OR (95% CI) <sup>a</sup> | N (%)*      | OR (95% CI) <sup>a</sup> |       |                     |
| Not Obese         | 826 (63.98) | 1.0 (ref)                | 109 (8.44)  | 1.29 (0.92 - 1.82)       |       |                     |
| Obese all Classes | 263 (20.37) | 1.14 (0.91 - 1.42)       | 93 (7.20)   | 1.46 (0.99 - 2.14)       | 0.94  | 0.07 (-0.66, 0.81)  |
| Obese Class I     | 145 (11.23) | 1.11 (0.84 - 1.47)       | 41 (3.18)   | 1.06 (0.64 - 1.75)       | 0.36  | -0.34 (-1.09, 0.40) |
| Obese Class II    | 73 (5.65)   | 1.15 (0.78 - 1.69)       | 29 (2.25)   | 2.35 (1.09 - 5.08)       | 0.30  | 0.99 (-0.98, 2.95)  |
| Obese Class III   | 45 (3.49)   | 1.19 (0.72 - 1.95)       | 23 (1.78)   | 1.90 (0.86 - 4.22)       | 0.65  | 0.45 (-1.23, 2.13)  |

ASD=Autism Spectrum Disorder; DD=Neurodevelopmental Disorders; GP=General Population controls; OR=Odds Ratio; CI=Confidence Interval; GDM=Gestational Diabetes

<sup>a</sup>Adjusted models include child sex, birth year, and maternal age, race, and education. For each combination of maternal conditions, both conditions (i.e., GDM and Asthma, GDM and Obesity) were both included in the model simultaneously.

\*N represents counts for ASD or DD.
